# Supplementary material
Source: Springer Nature journal article supplement (https://www.springermedizin.de/resource/supplementary/12936_2012_2682_MOESM6_ESM.pdf/9545028)
Supplement: MOESM6 [file 9545028]

An indication of the areas covered by the *ACTwatch* training sessions is given below. For almost all topics, hands-on exercises with medicine packages and other materials are used to reinforce learning. Technical training on the audit sheet is broken up by other topics, to provide variety during the sessions.

- Interviewer training
- Overview of health and malaria situation in the country
- Overview of *ACTwatch*
- Audit sheet: Generic names and brand names
- Audit sheet: Medicine formulations
- Audit sheet: Pack sizes
- Audit sheet: Rapid diagnostic tests for malaria
- Outlet types and inclusion criteria
- Outlet selection, ethics and consent procedure
- Conducting the census
- Audit sheet: sales volumes
- Audit sheet: retail price
- Provider questionnaire review
- Roles and responsibilities in the field
- Overcoming obstacles in the field
- Data collection monitoring sheets

- Supervisor / Quality controller training
- Recap of team structures, roles and responsibilities
- Advocacy in the field
- Overcoming obstacles
- Data integrity: Questionnaire management
- Data integrity: Questionnaire review (includes full review of questionnaires from field practice)
- Data integrity: Quality control procedures (e g, back-checks)
